# Supplementary material for: Numerical Simulations Reveal Randomness of Cu(II) Induced Aβ Peptide Dimerization under Conditions Present in Glutamatergic Synapses
Source: PLOS journal article supplement (doi:10.1371/journal.pone.0170749), 2017-01-26
Supplement: S2 (10.1371/journal.pone.0170749.s002) [file journal.pone.0170749.s002]

**S2 Table. Resting state. Average fraction of total A $\beta$  bound as a CuA $\beta$  I conformer [%] after 4ms.**

| A $\beta$ \Cu | 1       | 2       | 3       | 4       | 5       | 6       | 7       | 8       | 9       | 10      |
|---------------|---------|---------|---------|---------|---------|---------|---------|---------|---------|---------|
| 1             | 80.7116 | 95.9283 | 98.7877 | 99.3191 | 99.4138 | 99.4277 | 99.4275 | 99.4252 | 99.423  | 99.4212 |
| 2             | 47.9524 | 86.8869 | 96.7829 | 98.9015 | 99.3265 | 99.4073 | 99.4207 | 99.4215 | 99.4203 | 99.4189 |
| 3             | 32.9115 | 64.5065 | 89.9797 | 97.2923 | 98.9753 | 99.3305 | 99.4016 | 99.4146 | 99.4163 | 99.4158 |
| 4             | 24.8087 | 49.4247 | 72.9524 | 91.8363 | 97.6297 | 99.0266 | 99.3325 | 99.3964 | 99.4092 | 99.4116 |
| 5             | 19.8594 | 39.6971 | 59.3544 | 78.0864 | 93.0739 | 97.8693 | 99.0641 | 99.3334 | 99.3917 | 99.4044 |
| 6             | 16.5465 | 33.0971 | 49.6238 | 65.9842 | 81.5402 | 93.9575 | 98.0479 | 99.0924 | 99.3334 | 99.3874 |
| 7             | 14.178  | 28.3635 | 42.5513 | 56.7146 | 70.7248 | 84.0236 | 94.6198 | 98.186  | 99.1144 | 99.333  |
| 8             | 12.4014 | 24.8101 | 37.225  | 49.6409 | 62.0327 | 74.2829 | 85.8956 | 95.1345 | 98.2958 | 99.132  |
| 9             | 11.0196 | 22.0458 | 33.0785 | 44.1164 | 55.1544 | 66.1688 | 77.052  | 87.3572 | 95.5459 | 98.3852 |
| 10            | 9.91413 | 19.8344 | 29.7607 | 39.6925 | 49.6288 | 59.5646 | 69.4775 | 79.2681 | 88.5301 | 95.8822 |

| A $\beta$ \Cu | 1       | 2       | 3       | 4       | 5       | 6       | 7       | 8       | 9       | 10      |
|---------------|---------|---------|---------|---------|---------|---------|---------|---------|---------|---------|
| 1             | 48.4282 | 73.2814 | 86.0335 | 92.5746 | 95.9283 | 97.6465 | 98.5258 | 98.9748 | 99.2034 | 99.3191 |
| 2             | 36.6377 | 63.135  | 79.3614 | 88.6104 | 93.6884 | 96.4162 | 97.8613 | 98.6196 | 99.0145 | 99.2188 |
| 3             | 28.6728 | 52.9032 | 71.1457 | 83.1233 | 90.3478 | 94.4864 | 96.7816 | 98.0275 | 98.694  | 99.0465 |
| 4             | 23.1372 | 44.2973 | 62.3371 | 76.2203 | 85.6852 | 91.5988 | 95.0861 | 97.0653 | 98.1599 | 98.7543 |
| 5             | 19.1781 | 37.4648 | 54.199  | 68.5422 | 79.7327 | 87.5438 | 92.5426 | 95.553  | 97.2919 | 98.2677 |
| 6             | 16.2661 | 32.1261 | 47.2299 | 61.0549 | 72.9469 | 82.3115 | 88.9543 | 93.2799 | 95.9267 | 97.4769 |
| 7             | 14.0662 | 27.9461 | 41.4615 | 54.3196 | 66.0901 | 76.24   | 84.2865 | 90.0616 | 93.8719 | 96.2326 |
| 8             | 12.3624 | 24.6393 | 36.7416 | 48.5137 | 59.7039 | 69.9476 | 78.7972 | 85.8481 | 90.9539 | 94.3574 |
| 9             | 11.0128 | 21.9865 | 32.8772 | 43.6044 | 54.03   | 63.9334 | 72.9986 | 80.8411 | 87.1141 | 91.6884 |
| 10            | 9.92177 | 19.8261 | 29.6914 | 39.4768 | 49.109  | 58.4635 | 67.3443 | 75.4728 | 82.5127 | 88.1612 |

| A $\beta$ \Cu | 1       | 2       | 3       | 4       | 5       | 6       | 7       | 8       | 9       | 10      |
|---------------|---------|---------|---------|---------|---------|---------|---------|---------|---------|---------|
| 1             | 28.215  | 48.4282 | 62.9085 | 73.2814 | 80.7116 | 86.0335 | 89.8451 | 92.5746 | 94.5291 | 95.9283 |
| 2             | 24.2132 | 43.2346 | 57.8256 | 68.8368 | 77.0503 | 83.125  | 87.5892 | 90.8539 | 93.2322 | 94.9596 |
| 3             | 20.9679 | 38.5489 | 52.8663 | 64.2357 | 73.0828 | 79.8579 | 84.9814 | 88.8179 | 91.6684 | 93.7731 |
| 4             | 18.3181 | 34.4156 | 48.1749 | 59.6198 | 68.9058 | 76.2801 | 82.0325 | 86.4543 | 89.8131 | 92.3398 |
| 5             | 16.1396 | 30.8163 | 43.8461 | 55.1224 | 64.6345 | 72.4667 | 78.7772 | 83.7675 | 87.6518 | 90.6356 |
| 6             | 14.3358 | 27.7036 | 39.9239 | 50.8492 | 60.3864 | 68.512  | 75.2745 | 80.7827 | 85.1845 | 88.6446 |
| 7             | 12.8315 | 25.02   | 36.4143 | 46.8697 | 56.2647 | 64.5183 | 71.6028 | 77.5469 | 82.4294 | 86.3638 |
| 8             | 11.5681 | 22.7073 | 33.2993 | 43.2196 | 52.3479 | 60.5819 | 67.8507 | 74.1257 | 79.4244 | 83.8061 |
| 9             | 10.4992 | 20.7115 | 30.5477 | 39.908  | 48.6869 | 56.7823 | 64.1063 | 70.5965 | 76.225  | 81.0022 |
| 10            | 9.5886  | 18.9846 | 28.1227 | 36.9257 | 45.3076 | 53.1774 | 60.4468 | 67.0391 | 72.8989 | 77.9994 |

| A $\beta$ \Cu | 1       | 2       | 3       | 4       | 5       | 6       | 7       | 8       | 9       | 10      |
|---------------|---------|---------|---------|---------|---------|---------|---------|---------|---------|---------|
| 1             | 15.281  | 28.215  | 39.1624 | 48.4282 | 56.2707 | 62.9085 | 68.5265 | 73.2814 | 77.3057 | 80.7116 |
| 2             | 14.1072 | 26.3294 | 36.8873 | 45.9847 | 53.807  | 60.5204 | 66.2732 | 71.1959 | 75.4034 | 78.9958 |
| 3             | 13.0537 | 24.5911 | 34.7405 | 43.6314 | 51.3912 | 58.1415 | 63.9968 | 69.0628 | 73.436  | 77.2036 |
| 4             | 12.1064 | 22.9915 | 32.7229 | 41.3774 | 49.0373 | 55.7876 | 61.7129 | 66.8956 | 71.4145 | 75.3434 |
| 5             | 11.2533 | 21.5216 | 30.8335 | 39.2291 | 46.7572 | 53.4731 | 59.4363 | 64.7083 | 69.3509 | 73.4246 |
| 6             | 10.4837 | 20.1719 | 29.0691 | 37.1903 | 44.56   | 51.2108 | 57.1813 | 62.515  | 67.258  | 71.4581 |
| 7             | 9.78834 | 18.9333 | 27.4251 | 35.2624 | 42.4528 | 49.0116 | 54.961  | 60.3292 | 65.1487 | 69.4552 |
| 8             | 9.15888 | 17.7968 | 25.896  | 33.4451 | 40.4403 | 46.8843 | 52.787  | 58.1638 | 63.0358 | 67.428  |
| 9             | 8.5881  | 16.7539 | 24.4757 | 31.7366 | 38.5252 | 44.8359 | 50.6691 | 56.0307 | 60.9319 | 65.3886 |
| 10            | 8.06963 | 15.7965 | 23.1577 | 30.1336 | 36.7085 | 42.8713 | 48.6157 | 53.9402 | 58.8485 | 63.3486 |
