# Supplementary material for: Numerical Simulations Reveal Randomness of Cu(II) Induced Aβ Peptide Dimerization under Conditions Present in Glutamatergic Synapses
Source: PLOS journal article supplement (doi:10.1371/journal.pone.0170749), 2017-01-26
Supplement: S6 (10.1371/journal.pone.0170749.s006) [file journal.pone.0170749.s006]

S6 Table. Excited state. Average fraction of total A $\beta$  bound as a CuA $\beta$ <sub>2</sub> complex [%] after 20 s.

| A $\beta$ \ Cu | 50      | 100     | 200     | 500     |
|----------------|---------|---------|---------|---------|
| 1              | 0       | 0       | 0       | 0       |
| 2              | 10.9744 | 6.17136 | 3.2899  | 1.37039 |
| 3              | 19.5061 | 11.5473 | 6.34963 | 2.70035 |
| 4              | 26.3974 | 16.283  | 9.20394 | 3.99172 |
| 5              | 32.1085 | 20.4933 | 11.874  | 5.24626 |
| 6              | 36.9343 | 24.2659 | 14.3781 | 6.46559 |
| 7              | 41.0749 | 27.6691 | 16.7319 | 7.65124 |
| 8              | 44.6725 | 30.7572 | 18.9493 | 8.80467 |
| 9              | 47.8311 | 33.5739 | 21.0423 | 9.92721 |
| 10             | 50.6292 | 36.1551 | 23.0217 | 11.0202 |

| A $\beta$ \ Cu | 50      | 100     | 200     | 500      |
|----------------|---------|---------|---------|----------|
| 1              | 0       | 0       | 0       | 0        |
| 2              | 4.57279 | 2.52654 | 1.33264 | 0.551154 |
| 3              | 8.70931 | 4.91753 | 2.62717 | 1.09574  |
| 4              | 12.4727 | 7.18415 | 3.88528 | 1.63389  |
| 5              | 15.9138 | 9.33634 | 5.10855 | 2.16571  |
| 6              | 19.0745 | 11.383  | 6.29848 | 2.69133  |
| 7              | 21.9891 | 13.332  | 7.45649 | 3.21084  |
| 8              | 24.6866 | 15.1905 | 8.58388 | 3.72438  |
| 9              | 27.1914 | 16.965  | 9.68192 | 4.23203  |
| 10             | 29.5242 | 18.6613 | 10.7518 | 4.73391  |

| A $\beta$ \ Cu | 50      | 100     | 200      | 500      |
|----------------|---------|---------|----------|----------|
| 1              | 0       | 0       | 0        | 0        |
| 2              | 2.31913 | 1.27369 | 0.669413 | 0.276195 |
| 3              | 4.52493 | 2.51273 | 1.32918  | 0.550739 |
| 4              | 6.62588 | 3.71859 | 1.97952  | 0.82365  |
| 5              | 8.62961 | 4.89263 | 2.62064  | 1.09494  |
| 6              | 10.543  | 6.03616 | 3.25274  | 1.36462  |
| 7              | 12.3723 | 7.15039 | 3.87601  | 1.63272  |
| 8              | 14.1231 | 8.23649 | 4.49067  | 1.89923  |
| 9              | 15.8006 | 9.29556 | 5.09687  | 2.1642   |
| 10             | 17.4094 | 10.3286 | 5.69482  | 2.4276   |

| A $\beta$ \ Cu | 50      | 100      | 200      | 500      |
|----------------|---------|----------|----------|----------|
| 1              | 0       | 0        | 0        | 0        |
| 2              | 1.16876 | 0.639968 | 0.335746 | 0.138361 |
| 3              | 2.3086  | 1.27116  | 0.669061 | 0.276306 |
| 4              | 3.42061 | 1.89377  | 0.999973 | 0.413839 |
| 5              | 4.50584 | 2.50798  | 1.32851  | 0.550962 |
| 6              | 5.56528 | 3.11396  | 1.6547   | 0.687677 |
| 7              | 6.59987 | 3.71188  | 1.97856  | 0.823985 |
| 8              | 7.61052 | 4.30191  | 2.30013  | 0.959888 |
| 9              | 8.59807 | 4.88421  | 2.61942  | 1.09539  |
| 10             | 9.56333 | 5.45894  | 2.93647  | 1.23049  |
